# Supplementary material for: Molecular systematics of the subfamily Limenitidinae (Lepidoptera: Nymphalidae)
Source: PeerJ. 2018 Feb 2;6:e4311. doi: 10.7717/peerj.4311 (PMC5798401; doi:10.7717/peerj.4311)
Supplement: Table S1 [file peerj-06-4311-s001.xlsx]

## Sheet: gene_table.csv
Supplemental Table S1. List of taxa used in this study with GenBank accession numbers for sequenced gene regions.
Code	Tribe	Genus	Species	ArgKin	CAD	COI-begin	CycY	DDC	EF1a	Exp1	GAPDH	IDH	MDH	Nex9	PolII	ProSup	PSb	RpS2	RpS5	UDPG6DH	wingless
NW90-14	Acraeini	Actinote	stratonice	MG741844	EU141347	AY218233	MG741790	EU141459	AY218252	MG741606	-	EU141586	EU141650	MG741433	MG741379	MG741331	MG741295	EU141704	EU141427	MG741150	DQ018892
NW100-12	Acraeini	Cethosia	cyane	MG741812	GQ864627	DQ922870	MG741759	-	DQ922902	-	GQ864941	GQ865076	GQ865188	MG741401	MG741347	MG741312	MG741265	GQ865306	GQ865411	MG741127	DQ922838
NW76-12	Argynnini	Argynnis	paphia	MG741843	EU141343	AY090200	MG741789	MG741745	AY090166	MG741605	EU141519	EU141580	EU141644	MG741432	MG741378	MG741330	MG741294	EU141699	EU141421	MG741149	AY090133
NW70-6	Heliconiini	Heliconius	hecale	MG741841	EU141337	AY090202	MG741787	EU141436	AY090168	-	EU141514	EU141574	EU141638	MG741430	MG741376	-	MG741292	EU141694	EU141415	-	AY090135
PM16-09	Adoliadini	Abrota	ganga	MG741857	-	MG741112	MG741804	MG741752	MG741713	-	MG741583	-	-	MG741447	MG741392	-	MG741308	-	MG741225	-	MG741946
NW102-9	Adoliadini	Aterica	galene	MG741820	GQ864614	GQ864739	MG741767	MG741736	GQ864833	-	GQ864931	GQ865068	GQ865176	MG741409	MG741355	MG741318	MG741273	GQ865294	GQ865398	MG741135	GQ864427
NW112-4	Adoliadini	Bassarona	dunya	MG741824	GQ864618	GQ864742	MG741771	-	GQ864836	-	GQ864933	GQ865071	GQ865180	MG741413	MG741359	MG741322	MG741277	GQ865298	GQ865401	-	GQ864430
NW121-23	Adoliadini	Bassarona	teuta	-	-	MG741083	-	-	MG741684	-	-	-	MG741465	-	-	-	-	-	MG741209	-	MG741918
FM-89	Adoliadini	Bebearia	absolon	MG741806	-	MG741030	MG741754	MG741725	MG741632	-	-	-	-	MG741394	MG741340	MG741310	MG741259	MG741234	MG741179	-	MG741887
FM-110	Adoliadini	Bebearia	carshena	-	-	MG741014	-	-	MG741616	-	-	-	-	-	-	-	-	-	MG741164	-	MG741871
PM12-04	Adoliadini	Bebearia	cocalia	-	-	MG741102	-	-	MG741703	-	-	-	MG741481	-	-	-	-	-	MG741218	-	MG741936
FM-139	Adoliadini	Bebearia	flaminia	-	-	MG741022	-	-	MG741624	-	-	-	-	-	-	-	-	-	MG741171	-	MG741879
NW117-17	Adoliadini	Bebearia	mardania	MG741828	-	MG741078	MG741775	-	MG741680	-	MG741560	-	MG741460	MG741417	MG741363	MG741325	MG741281	MG741242	MG741204	-	MG741914
FM-118	Adoliadini	Bebearia	oxione	-	-	MG741019	-	-	MG741621	-	MG741520	-	-	-	-	-	-	-	MG741168	-	MG741876
NW102-15	Adoliadini	Bebearia	sophus	MG741817	GQ864620	GQ864744	MG741764	MG741733	GQ864838	-	GQ864935	GQ865073	GQ865182	MG741406	MG741352	MG741315	MG741270	GQ865300	GQ865403	MG741132	GQ864432
FM-112	Adoliadini	Bebearia	tentyris	-	-	MG741015	-	-	MG741617	-	-	-	-	-	-	-	-	-	MG741165	-	MG741872
FM-113	Adoliadini	Bebearia	zonara	-	-	MG741016	-	-	MG741618	-	-	-	-	-	-	-	-	-	-	-	MG741873
NW114-16	Adoliadini	Catuna	crithea	MG741825	GQ864626	GQ864748	MG741772	-	GQ864842	-	GQ864940	-	GQ865187	MG741414	MG741360	-	MG741278	GQ865305	GQ865410	MG741139	GQ864436
FM-147	Adoliadini	Catuna	niji	-	-	MG741024	-	-	MG741626	-	MG741524	-	-	-	-	-	-	-	MG741173	-	MG741881
FM-93	Adoliadini	Catuna	oberthueri	-	-	MG741031	-	-	MG741633	-	MG741526	-	-	-	-	-	-	-	MG741180	-	MG741888
NW99-7	Adoliadini	Crenidomimas	concordia	MG741851	GQ864633	GQ864752	MG741797	MG741749	GQ864846	-	GQ864949	GQ865081	GQ865193	MG741440	MG741386	MG741335	MG741301	GQ865309	GQ865418	MG741156	GQ864440
NW159-4	Adoliadini	Cynandra	opis	MG741837	-	MG741093	MG741784	MG741742	MG741694	MG741603	MG741571	-	MG741474	MG741426	MG741372	MG741328	MG741289	MG741250	MG741213	MG741145	MG741928
NW103-3	Adoliadini	Dophla	evelina	MG741821	GQ864639	GQ864757	MG741768	MG741737	GQ864851	-	GQ864956	GQ865087	GQ865200	MG741410	MG741356	MG741319	MG741274	GQ865322	GQ865424	MG741136	GQ864446
FM-64	Adoliadini	Euphaedra	adonina	-	-	MG741026	-	-	MG741628	-	-	-	-	-	-	-	-	-	MG741175	-	MG741883
UN0771	Adoliadini	Euphaedra	alacris	-	-	MG741122	-	-	MG741723	-	-	-	-	-	-	-	-	-	MG741232	-	MG741956
KAP168	Adoliadini	Euphaedra	ceres	-	-	MG741062	-	-	MG741664	-	-	-	-	-	-	-	-	-	MG741188	-	MG741899
KAP005	Adoliadini	Euphaedra	crockeri	-	-	MG741058	-	-	MG741660	-	-	-	-	-	-	-	-	-	MG741184	-	MG741895
KAP219	Adoliadini	Euphaedra	harpalyce	-	-	MG741063	-	-	MG741665	-	-	-	-	-	-	-	-	-	MG741189	-	MG741900
NW95-16	Adoliadini	Euphaedra	herberti	MG741845	EU141350	AY218241	MG741791	MG741746	AY218261	MG741607	EU141524	EU141588	EU141652	MG741434	MG741380	MG741332	MG741296	EU141706	EU141429	MG741151	AY218279
FM-68	Adoliadini	Euphaedra	hewitsoni	-	-	MG741027	-	-	MG741629	-	-	-	-	-	-	-	-	-	MG741176	-	MG741884
FM-72	Adoliadini	Euphaedra	hollandi	-	-	MG741029	-	-	MG741631	-	-	-	-	-	-	-	-	-	MG741178	-	MG741886
PM12-05	Adoliadini	Euphaedra	imitans	-	-	MG741103	-	-	MG741704	-	-	-	-	-	-	-	-	-	MG741219	-	MG741937
KAP088	Adoliadini	Euphaedra	janetta	-	-	MG741060	-	-	MG741662	-	-	-	-	-	-	-	-	-	MG741186	-	MG741897
PM12-14	Adoliadini	Euphaedra	kakamega	-	-	MG741105	-	-	MG741706	-	-	-	-	-	-	-	-	-	MG741220	-	MG741939
KAP226	Adoliadini	Euphaedra	mariachristinae	-	-	MG741064	-	-	MG741666	-	-	-	-	-	-	-	-	-	MG741190	-	MG741901
KAP097	Adoliadini	Euphaedra	medon	-	-	MG741061	-	-	MG741663	-	-	-	-	-	-	-	-	-	MG741187	-	MG741898
KAP285	Adoliadini	Euphaedra	minuta	-	-	MG741066	-	-	MG741668	-	-	-	-	-	-	-	-	-	MG741192	-	MG741903
KAP293	Adoliadini	Euphaedra	modesta	-	-	MG741067	-	-	MG741669	-	-	-	-	-	-	-	-	-	MG741193	-	MG741904
FM-70	Adoliadini	Euphaedra	permixtum	-	-	MG741028	-	-	MG741630	-	-	-	-	-	-	-	-	-	MG741177	-	MG741885
KAP077	Adoliadini	Euphaedra	phaethusa	-	-	MG741059	-	-	MG741661	-	-	-	-	-	-	-	-	-	MG741185	-	MG741896
NW167-16	Adoliadini	Euphaedra	sarcoptera	-	-	MG741096	-	-	MG741697	-	-	-	-	-	-	-	-	-	MG741214	-	MG741930
UN0765	Adoliadini	Euphaedra	spatiosa	-	-	MG741121	-	-	MG741722	-	-	-	-	-	-	-	-	-	MG741231	-	MG741955
KAP270	Adoliadini	Euphaedra	themis	-	-	MG741065	-	-	MG741667	-	-	-	-	-	-	-	-	-	MG741191	-	MG741902
NW99-11	Adoliadini	Euptera	elabontas	MG741849	GQ864649	GQ864768	MG741795	-	GQ864862	-	-	GQ865094	GQ865210	MG741438	MG741384	MG741334	MG741300	-	GQ865436	MG741155	GQ864456
NW117-16	Adoliadini	Euptera	kinugnana	-	-	MG741077	-	-	MG741679	-	-	-	-	-	-	-	-	-	MG741203	-	MG741913
FM-121	Adoliadini	Euriphene	?4	-	-	MG741021	-	-	MG741623	-	MG741522	-	-	-	-	-	-	-	MG741170	-	MG741878
FM-120	Adoliadini	Euriphene	?5	-	-	MG741020	-	-	MG741622	-	MG741521	-	-	-	-	-	-	-	MG741169	-	MG741877
FM-117	Adoliadini	Euriphene	?6	-	-	MG741018	-	-	MG741620	-	MG741519	-	-	-	-	-	-	-	MG741167	-	MG741875
FM-155	Adoliadini	Euriphene	?7	-	-	MG741025	-	-	MG741627	-	MG741525	-	-	-	-	-	-	-	MG741174	-	MG741882
NW117-11	Adoliadini	Euriphene	aridatha	-	-	MG741076	-	-	MG741678	-	-	-	-	-	-	-	-	-	MG741202	-	MG741912
FM-145	Adoliadini	Euriphene	barombina	-	-	MG741023	-	-	MG741625	-	MG741523	-	-	-	-	-	-	-	MG741172	-	MG741880
FM-96	Adoliadini	Euriphene	goniogramma	-	-	MG741032	-	-	MG741634	-	MG741527	-	-	-	-	-	-	-	MG741181	-	MG741889
NW114-12	Adoliadini	Euriphene	iris	-	-	MG741069	-	-	MG741671	-	MG741553	-	-	-	-	-	-	-	MG741195	-	MG741905
UN0813	Adoliadini	Euriphene	ribensis	-	-	MG741123	-	-	MG741724	-	MG741591	-	-	-	-	-	-	-	MG741233	-	MG741957
FM-115	Adoliadini	Euriphene	tadema	-	-	MG741017	-	-	MG741619	-	MG741518	-	-	-	-	-	-	-	MG741166	-	MG741874
NW99-10	Adoliadini	Euriphene	tadema?	MG741848	GQ864651	GQ864769	MG741794	MG741748	GQ864863	-	GQ864968	GQ865096	GQ865212	MG741437	MG741383	MG741333	MG741299	GQ865324	GQ865438	MG741154	GQ864457
NW107-18	Adoliadini	Euryphura	chalcis	MG741823	GQ864653	GQ864771	MG741770	MG741739	GQ864865	MG741595	GQ864970	GQ865098	GQ865214	MG741412	MG741358	MG741321	MG741276	GQ865325	GQ865440	MG741138	GQ864459
PM12-13	Adoliadini	Euryphura	chalcis	-	-	MG741104	-	-	MG741705	-	-	-	-	-	-	-	-	-	-	-	MG741938
NW118-16	Adoliadini	Euthalia	adonia	-	-	MG741079	-	-	MG741681	-	MG741561	-	MG741461	-	-	-	-	-	MG741205	-	MG741915
NW100-14	Adoliadini	Euthalia	monina	MG741814	-	MG741068	MG741761	MG741731	MG741670	MG741593	MG741552	-	MG741455	MG741403	MG741349	MG741313	MG741267	MG741240	MG741194	MG741129	-
PM16-19	Adoliadini	Euthaliopsis	aetion	MG741858	-	MG741116	MG741805	MG741753	MG741717	-	-	-	MG741488	MG741448	MG741393	MG741339	MG741309	MG741258	MG741226	MG741160	MG741950
NW123-20	Adoliadini	Hamanumida	daedalus	MG741829	-	GQ864774	MG741776	-	GQ864868	MG741597	GQ864977	GQ865102	GQ865217	MG741418	MG741364	-	MG741282	GQ865328	GQ865446	MG741141	GQ864462
NW135-1	Adoliadini	Lexias	pardalis	MG741832	GQ864672	GQ864785	MG741779	-	GQ864879	MG741599	GQ864992	GQ865117	GQ865231	MG741421	MG741367	MG741326	MG741285	MG741245	GQ865461	MG741143	GQ864473
BD001	Adoliadini	Lexias	sp	-	-	MG741008	-	-	MG741610	-	MG741512	-	MG741449	-	-	-	-	-	MG741161	-	MG741865
JL13-19	Adoliadini	Pseudargynnis	hegemone	MG741808	-	MG741034	MG741756	-	MG741636	-	MG741529	-	-	MG741396	MG741342	MG741311	MG741261	MG741236	MG741182	MG741124	MG741891
JM11-1	Adoliadini	Pseudathyma	sibyllina	MG741810	-	MG741035	-	MG741728	MG741645	MG741592	-	-	MG741454	MG741398	MG741344	-	MG741262	MG741237	MG741183	MG741125	MG741893
UN0745	Adoliadini	Tanaecia	flora	-	-	MG741118	-	-	MG741719	-	MG741588	-	MG741490	-	-	-	-	-	MG741228	-	MG741952
NW100-15	Adoliadini	Tanaecia	julii	MG741815	GQ864714	GQ864809	MG741762	-	GQ864903	-	GQ865035	GQ865151	GQ865267	MG741404	MG741350	MG741314	MG741268	GQ865368	GQ865498	MG741130	GQ864497
BD011	Adoliadini	Tanaecia	lepidea	-	-	MG741012	-	-	MG741614	-	MG741516	-	MG741452	-	-	-	-	-	MG741163	-	MG741869
NW121-19	Adoliadini	Tanaecia	pelea?	MG741859	MG741862	MG741082	-	-	-	-	MG741563	MG741506	MG741464	-	-	-	-	MG741243	MG741208	-	-
NW142-9	Adoliadini	Tanaecia	sp	-	-	MG741088	-	-	MG741689	-	MG741567	-	MG741470	-	-	-	-	-	MG741211	-	MG741923
NW121-16	Adoliadini	Tanaecia	trigerta	-	-	MG741081	-	-	MG741683	-	MG741562	-	MG741463	-	-	-	-	-	MG741207	-	MG741917
MT032	Cymothoini	Bhagadatta	austenia	-	-	NC_024413	-	-	-	-	-	-	-	-	-	-	-	-	-	-	-
SS-041	Cymothoini	Cymothoe	adela	-	-	HE964949	-	-	-	-	HE963090	-	-	-	-	-	-	-	HE964843	-	HE964890
SW-005	Cymothoini	Cymothoe	alcimeda	-	-	HE964951	-	-	-	-	HE963092	-	-	-	-	-	-	-	HE964845	-	HE964892
TL-011	Cymothoini	Cymothoe	althea	-	-	HE964953	-	-	-	-	HE963093	HE964799	-	-	-	-	-	-	HE964847	-	HE964893
OB-060	Cymothoini	Cymothoe	aramis	-	-	HE964930	-	-	-	-	HE963075	HE964791	-	-	-	-	-	-	HE964826	-	HE964873
JB-001	Cymothoini	Cymothoe	baylissi ined.	-	-	HE964924	-	-	-	-	HE963069	-	-	-	-	-	-	-	HE964821	-	HE964869
RV-386	Cymothoini	Cymothoe	beckeri	-	-	HE964939	-	-	-	-	HE963083	HE964796	-	-	-	-	-	-	HE964834	-	HE964881
NW102-16	Cymothoini	Cymothoe	caenis	MG741818	GQ864636	GQ864754	MG741765	MG741734	GQ864848	-	GQ864952	GQ865083	GQ865196	MG741407	MG741353	MG741316	MG741271	GQ865312	GQ865420	MG741133	GQ864442
GW-4401	Cymothoini	Cymothoe	capella	-	-	HE964920	-	-	-	-	HE963066	-	-	-	-	-	-	-	HE964818	-	HE964866
GW-13018	Cymothoini	Cymothoe	collarti	-	-	HE964915	-	-	-	-	HE963062	-	-	-	-	-	-	-	HE964813	-	HE964861
RV-332	Cymothoini	Cymothoe	confusa	-	-	HE964937	-	-	-	-	HE963081	HE964795	-	-	-	-	-	-	HE964832	-	HE964879
TL-031	Cymothoini	Cymothoe	druryi	-	-	HE964955	-	-	-	-	HE963095	-	-	-	-	-	-	-	-	-	HE964895
CREO-119	Cymothoini	Cymothoe	fumana	-	-	HE964905	-	-	-	-	HE963054	HE964785	-	-	-	-	-	-	HE964805	-	HE964853
GW-12490	Cymothoini	Cymothoe	harmilla	-	-	HE964914	-	-	-	-	HE963061	-	-	-	-	-	-	-	HE964812	-	HE964860
GW-14794	Cymothoini	Cymothoe	haynae	-	-	HE964919	-	-	-	-	HE963065	-	-	-	-	-	-	-	HE964817	-	HE964865
RV-226	Cymothoini	Cymothoe	herminia	-	-	HE964934	-	-	-	-	HE963079	-	-	-	-	-	-	-	HE964830	-	HE964877
FM-008	Cymothoini	Cymothoe	hesiodotus	-	-	HE964908	-	-	-	-	HE963056	-	-	-	-	-	-	-	HE964807	-	HE964855
RV-390	Cymothoini	Cymothoe	hobarti	-	-	HE964940	-	-	-	-	HE963084	HE964797	-	-	-	-	-	-	HE964835	-	HE964882
RW-030	Cymothoini	Cymothoe	indamora	-	-	HE964943	-	-	-	-	HE963087	-	-	-	-	-	-	-	HE964838	-	HE964885
RV-060	Cymothoini	Cymothoe	jodutta	-	-	HE964932	-	-	-	-	HE963077	HE964792	-	-	-	-	-	-	HE964828	-	HE964875
RV-392	Cymothoini	Cymothoe	lurida	-	-	HE964941	-	-	-	-	HE963085	-	-	-	-	-	-	-	HE964836	-	HE964883
CREO-100	Cymothoini	Cymothoe	mabillei	-	-	HE964903	-	-	-	-	HE963052	HE964783	-	-	-	-	-	-	HE964803	-	HE964851
FM-183	Cymothoini	Cymothoe	reginaeelisabethae	-	-	HE964911	-	-	-	-	HE963059	HE964786	-	-	-	-	-	-	HE964810	-	HE964857
NW102-8	Cymothoini	Harma	theobene	MG741819	GQ864657	GQ864775	MG741766	MG741735	GQ864869	-	GQ864978	GQ865103	GQ865218	MG741408	MG741354	MG741317	MG741272	GQ865329	GQ865447	MG741134	GQ864463
KRW-05-0028	Limenitidini	Adelpha	alala	-	-	GQ922974	-	-	GQ923021	-	HQ291179	HQ291207	-	-	-	-	-	-	HQ291233	-	GQ923071
KRW-05-0030	Limenitidini	Adelpha	boreas	-	-	GQ922976	-	-	GQ923023	-	-	-	-	-	-	-	-	-	-	-	GQ923073
NW107-16	Limenitidini	Adelpha	californica	MG741822	GQ864597	AY788591	MG741769	MG741738	AY788693	MG741594	GQ864917	GQ865053	-	MG741411	MG741357	MG741320	MG741275	GQ865281	-	MG741137	AY788457
KRW-05-0032	Limenitidini	Adelpha	capucinus	-	-	GQ922977	-	-	GQ923024	-	-	-	-	-	-	-	-	-	-	-	GQ923074
KRW-05-0024	Limenitidini	Adelpha	cocala	-	-	GQ922978	-	-	GQ923025	-	-	-	-	-	-	-	-	-	-	-	GQ923075
KRW-05-0036	Limenitidini	Adelpha	corcyra	-	-	GQ922979	-	-	GQ923027	-	HQ291180	HQ291208	-	-	-	-	-	-	HQ291234	-	GQ923077
KRW-05-0039	Limenitidini	Adelpha	cytherea	-	-	GQ922980	-	-	GQ923028	-	HQ291181	HQ291209	-	-	-	-	-	-	HQ291235	-	GQ923078
KRW-05-0016	Limenitidini	Adelpha	delinita	-	-	GQ922982	-	-	GQ923030	-	HQ291182	HQ291210	-	-	-	-	-	-	HQ291236	-	GQ923080
KRW-05-0011	Limenitidini	Adelpha	epione	-	-	GQ922984	-	-	GQ923032	-	-	-	-	-	-	-	-	-	-	-	GQ923082
KRW-05-0041	Limenitidini	Adelpha	erotia	-	-	GQ922985	-	-	GQ923033	-	-	-	-	-	-	-	-	-	-	-	GQ923083
KRW-05-0043	Limenitidini	Adelpha	ethelda	-	-	GQ922987	-	-	GQ923035	-	-	-	-	-	-	-	-	-	-	-	GQ923085
NW152-3	Limenitidini	Adelpha	gelania	MG741834	-	HQ434335	MG741781	MG741741	HQ434336	MG741600	-	-	-	MG741423	MG741369	MG741327	MG741286	MG741247	-	-	HQ434337
KRW-05-0046	Limenitidini	Adelpha	iphicleola	-	-	GQ922988	-	-	GQ923036	-	-	-	-	-	-	-	-	-	-	-	GQ923086
KRW-05-0550	Limenitidini	Adelpha	iphiclus	-	-	GQ922989	-	-	GQ923037	-	HQ291183	HQ291211	-	-	-	-	-	-	HQ291237	-	GQ923087
KRW-05-0047	Limenitidini	Adelpha	irmina	-	-	GQ922990	-	-	GQ923038	-	-	-	-	-	-	-	-	-	-	-	GQ923088
KRW-05-0025	Limenitidini	Adelpha	jordani	-	-	GQ922991	-	-	GQ923039	-	-	-	-	-	-	-	-	-	-	-	GQ923089
KRW-05-0048	Limenitidini	Adelpha	justina	-	-	GQ922992	-	-	GQ923040	-	-	-	-	-	-	-	-	-	-	-	GQ923090
KRW-05-0050	Limenitidini	Adelpha	leucophthalma	-	-	GQ922994	-	-	GQ923042	-	-	-	-	-	-	-	-	-	-	-	GQ923092
KRW-05-0013	Limenitidini	Adelpha	lycorias	-	-	GQ922995	-	-	GQ923043	-	HQ291184	HQ291212	-	-	-	-	-	-	HQ291238	-	GQ923093
KRW-05-0006	Limenitidini	Adelpha	malea	-	-	GQ922997	-	-	GQ923045	-	-	-	-	-	-	-	-	-	-	-	GQ923095
KRW-05-0055	Limenitidini	Adelpha	mesentina	-	-	GQ922998	-	-	GQ923047	-	-	-	-	-	-	-	-	-	-	-	GQ923097
KRW-05-0019	Limenitidini	Adelpha	naxia	-	-	GQ922999	-	-	GQ923048	-	HQ291185	HQ291213	-	-	-	-	-	-	HQ291239	-	GQ923098
KRW-05-0056	Limenitidini	Adelpha	olynthia	-	-	GQ923000	-	-	GQ923049	-	-	-	-	-	-	-	-	-	-	-	GQ923099
KW-081002-09	Limenitidini	Adelpha	paraena	-	-	GQ923001	-	-	GQ923050	-	HQ291186	-	-	-	-	-	-	-	HQ291240	-	GQ923100
KRW-05-0062	Limenitidini	Adelpha	thesprotia	-	-	GQ923008	-	-	GQ923058	-	HQ291187	HQ291214	-	-	-	-	-	-	HQ291241	-	GQ923109
KRW-05-0067	Limenitidini	Adelpha	tracta	-	-	GQ923010	-	-	GQ923060	-	HQ291188	HQ291215	-	-	-	-	-	-	HQ291242	-	GQ923111
NW134-14	Limenitidini	Athyma	cama	MG741831	-	MG741084	MG741778	-	MG741685	MG741598	MG741564	-	MG741466	MG741420	MG741366	-	MG741284	MG741244	MG741210	-	MG741919
PM16-04	Limenitidini	Athyma	libnites	MG741856	-	MG741111	MG741803	-	MG741712	-	MG741582	-	-	MG741446	MG741391	MG741338	MG741307	MG741257	MG741224	-	MG741945
UN0734	Limenitidini	Athyma	perius	-	-	MG741117	-	-	MG741718	-	MG741587	-	MG741489	-	-	-	-	-	MG741227	-	MG741951
NW158-3	Limenitidini	Athyma	punctata	MG741836	-	MG741092	MG741783	-	MG741693	MG741602	MG741570	-	MG741473	MG741425	MG741371	-	MG741288	MG741249	MG741212	-	MG741927
UN0746	Limenitidini	Athyma	ranga	-	-	MG741119	-	-	MG741720	-	MG741589	-	MG741491	-	-	-	-	-	MG741229	-	MG741953
NW99-4	Limenitidini	Athyma	selenophora	MG741850	GQ864615	GQ864740	MG741796	-	GQ864834	-	GQ864932	GQ865069	GQ865177	MG741439	MG741385	-	-	GQ865295	GQ865399	-	GQ864428
UN0747	Limenitidini	Athyma	selenophora	-	-	MG741120	-	-	MG741721	-	MG741590	-	MG741492	-	-	-	-	-	MG741230	-	MG741954
BD009	Limenitidini	Athyma	sp	-	-	MG741011	-	-	MG741613	-	MG741515	-	-	-	-	-	-	-	MG741162	-	MG741868
SPM044	Limenitidini	Auzakia	danava	-	-	GQ923013	-	-	-	-	HQ291189	-	-	-	-	-	-	-	-	-	GQ923115
PM16-03	Limenitidini	Chalinga	pratti	-	-	MG741110	MG741802	MG741751	MG741711	-	MG741581	-	MG741485	MG741445	MG741390	MG741337	MG741306	MG741256	MG741223	MG741159	MG741944
PM16-01	Limenitidini	Lamasia	lyncides	MG741854	-	MG741108	MG741800	-	MG741709	-	MG741580	-	MG741484	MG741443	MG741388	-	MG741304	MG741254	MG741221	-	MG741942
SPM023	Limenitidini	Limenitis	amphyssa	-	-	DQ205104	-	-	DQ208216	-	HQ291206	HQ291219	-	-	-	-	-	-	HQ291258	-	GQ985327
SPM001	Limenitidini	Limenitis	archippus	-	-	DQ205122	-	-	DQ208217	-	HQ291194	HQ291220	-	-	-	-	-	-	HQ291247	-	GQ985317
SPM008	Limenitidini	Limenitis	arthemis	-	-	DQ205125	-	-	DQ208218	-	HQ291195	HQ291217	-	-	-	-	-	-	HQ291248	-	GQ985318
SPM029	Limenitidini	Limenitis	camilla	-	-	DQ205111	-	-	DQ208220	-	HQ291201	HQ291221	-	-	-	-	-	-	HQ291253	-	GQ985323
JM3-9	Limenitidini	Limenitis	ciocolatina	MG741811	-	MG741055	MG741758	-	MG741657	-	MG741549	-	-	MG741400	MG741346	-	MG741264	MG741239	-	-	MG741894
PM16-18	Limenitidini	Limenitis	disjuncta	-	-	MG741115	-	-	MG741716	-	MG741586	-	MG741487	-	-	-	-	-	-	-	MG741949
SPM036	Limenitidini	Limenitis	doerriesi	-	-	DQ205116	-	-	DQ208221	-	-	-	-	-	-	-	-	-	-	-	-
JL13-17	Limenitidini	Limenitis	glorifica	MG741807	-	MG741033	MG741755	MG741726	MG741635	-	MG741528	-	-	MG741395	MG741341	-	MG741260	MG741235	-	-	MG741890
SPM025	Limenitidini	Limenitis	helmanni	-	-	DQ205119	-	-	DQ208223	-	HQ291202	HQ291223	-	-	-	-	-	-	HQ291254	-	GQ985324
SPM027	Limenitidini	Limenitis	homeyeri	-	-	DQ205118	-	-	DQ208224	-	HQ291203	HQ291224	-	-	-	-	-	-	HQ291255	-	-
SPM004	Limenitidini	Limenitis	lorquini	-	-	DQ205106	-	-	DQ208225	-	HQ291198	HQ291225	-	-	-	-	-	-	-	-	GQ985321
NW167-12	Limenitidini	Limenitis	mimica	-	-	MG741095	-	-	MG741696	-	MG741572	-	MG741475	-	-	-	-	-	-	-	MG741929
SPM024	Limenitidini	Limenitis	moltrechti	-	-	DQ205127	-	-	DQ208226	-	HQ291205	HQ291226	-	-	-	-	-	-	HQ291257	-	GQ985326
SPM031	Limenitidini	Limenitis	populi	-	-	DQ205105	-	-	DQ208227	-	HQ291204	HQ291227	-	-	-	-	-	-	HQ291256	-	GQ985325
NW157-7	Limenitidini	Limenitis	recurva	-	-	MG741091	-	-	MG741692	-	MG741569	-	MG741472	-	-	-	-	-	-	-	MG741926
NW67-2	Limenitidini	Limenitis	reducta	MG741840	EU141331	AY090217	MG741786	EU141453	AY090183	MG741604	EU141509	EU141568	EU141632	MG741429	MG741375	-	MG741291	EU141688	EU141409	MG741147	AY090150
SPM006	Limenitidini	Limenitis	weidemeyerii	-	-	DQ205101	-	-	DQ208229	-	HQ291199	HQ291228	-	-	-	-	-	-	HQ291251	-	GQ985322
NW17729	Limenitidini	Moduza	lymire	-	MG741864	MG741097	-	-	MG741698	-	MG741573	-	MG741476	-	-	-	-	-	MG741215	-	MG741931
SPM040	Limenitidini	Moduza	pintuyana	-	-	DQ205134	-	-	DQ208230	-	GQ865003	GQ865127	-	-	-	-	-	-	GQ865472	-	GQ923117
NW114-18	Limenitidini	Moduza	procris	MG741826	GQ864684	GQ864791	MG741773	-	GQ864885	MG741596	GQ865003	GQ865127	GQ865241	MG741415	MG741361	MG741323	MG741279	GQ865347	GQ865472	-	GQ864480
SPM046	Limenitidini	Pandita	sinope	-	-	GQ923016	-	-	GQ923066	-	HQ291191	HQ291230	-	-	-	-	-	-	HQ291243	-	GQ923118
NW156-17	Limenitidini	Parasarpa	albomaculata	MG741835	-	MG741089	MG741782	-	MG741690	MG741601	MG741568	-	MG741471	MG741424	MG741370	-	MG741287	MG741248	-	-	MG741924
PM16-15	Limenitidini	Parasarpa	dudu	-	-	MG741114	-	-	MG741715	-	MG741585	-	MG741486	-	-	-	-	-	-	-	MG741948
SPM047	Limenitidini	Parasarpa	zayla	-	-	GQ923018	-	-	GQ923068	-	HQ291192	HQ291231	-	-	-	-	-	-	HQ291244	-	GQ923120
NW167-11	Limenitidini	Patsuia	sinensis	MG741838	-	MG741094	-	-	MG741695	-	-	-	-	MG741427	MG741373	-	-	MG741251	-	-	-
PM16-02	Limenitidini	Sumalia	daraxa	MG741855	-	MG741109	MG741801	-	MG741710	-	-	-	-	MG741444	MG741389	-	MG741305	MG741255	MG741222	-	MG741943
NW17812	Limenitidini	Tacola	eulimene	-	MG741863	MG741099	-	-	MG741700	-	MG741575	MG741510	MG741478	-	-	-	-	-	MG741217	-	MG741933
BD014	Limenitidini	Tacola	larymna	-	-	MG741013	-	-	MG741615	-	MG741517	-	-	-	-	-	-	-	-	-	MG741870
NW118-18	Limenitidini	Tarattia	lysanias	-	-	MG741080	-	-	MG741682	-	-	-	MG741462	-	-	-	-	-	MG741206	-	MG741916
NW17808	Neptini	Lasippa	neriphus	MG741839	MG741860	MG741098	MG741785	MG741743	MG741699	-	MG741574	MG741509	MG741477	MG741428	MG741374	-	MG741290	MG741252	MG741216	MG741146	MG741932
NW100-13	Neptini	Lebadea	martha	MG741813	GQ864671	GQ864784	MG741760	MG741730	GQ864878	-	GQ864991	GQ865116	GQ865230	MG741402	MG741348	-	MG741266	GQ865339	GQ865460	MG741128	GQ864472
JM6-4	Neptini	Neptis	agouale	-	-	MG741057	-	-	MG741659	-	MG741551	-	-	-	-	-	-	-	-	-	-
JM1-5	Neptini	Neptis	alwina	-	-	MG741042	-	-	MG741643	-	MG741536	-	-	-	-	-	-	-	-	-	-
PM16-13	Neptini	Neptis	anjana	-	-	MG741113	-	-	MG741714	-	MG741584	-	-	-	-	-	-	-	-	-	MG741947
JM1-7	Neptini	Neptis	antilope	-	-	MG741043	-	-	MG741644	-	MG741537	MG741496	-	-	-	-	-	-	-	-	-
JM1-2	Neptini	Neptis	arachne	-	-	MG741039	-	-	MG741640	-	MG741533	-	-	-	-	-	-	-	-	-	-
JM2-24	Neptini	Neptis	armandia	-	-	MG741051	-	-	MG741653	-	MG741545	MG741501	-	-	-	-	-	-	-	-	-
JM2-3	Neptini	Neptis	biafra	-	-	MG741052	-	-	MG741654	-	MG741546	MG741502	-	-	-	-	-	-	-	-	-
JM2-22	Neptini	Neptis	cydippe	-	-	MG741049	-	-	MG741651	-	MG741543	-	-	-	-	-	-	-	-	-	-
JM1-3	Neptini	Neptis	divisa	-	-	MG741040	-	-	MG741641	-	MG741534	MG741494	-	-	-	-	-	-	-	-	-
JM2-15	Neptini	Neptis	exaleuca	-	-	MG741046	-	-	MG741648	-	MG741540	-	-	-	-	-	-	-	-	-	-
NW98-3	Neptini	Neptis	ida	MG741847	EU141353	EU141369	MG741793	EU141452	EU136676	-	EU141526	EU141591	EU141655	MG741436	MG741382	-	MG741298	EU141709	EU141432	MG741153	EU141250
JM1-12	Neptini	Neptis	ilos	-	-	MG741038	-	-	MG741639	-	MG741532	MG741493	-	-	-	-	-	-	-	-	-
JM2-10	Neptini	Neptis	melicerta	-	-	MG741045	-	-	MG741647	-	MG741539	MG741498	-	-	-	-	-	-	-	-	-
JM2-23	Neptini	Neptis	miah	-	-	MG741050	-	-	MG741652	-	MG741544	MG741500	-	-	-	-	-	-	-	-	-
JM6-3	Neptini	Neptis	nicobule	-	-	MG741056	-	-	MG741658	-	MG741550	MG741505	-	-	-	-	-	-	-	-	-
JM2-5	Neptini	Neptis	nicomedes	-	-	MG741053	-	-	MG741655	-	MG741547	MG741503	-	-	-	-	-	-	-	-	-
JM2-1	Neptini	Neptis	nysiades	-	-	MG741044	-	MG741729	MG741646	-	MG741538	MG741497	-	MG741399	MG741345	-	MG741263	MG741238	-	MG741126	-
JM1-11	Neptini	Neptis	philyra	-	-	MG741037	-	-	MG741638	-	MG741531	-	-	-	-	-	-	-	-	-	-
JM3-2	Neptini	Neptis	praslini	-	-	MG741054	-	-	MG741656	-	MG741548	MG741504	-	-	-	-	-	-	-	-	-
NW137-5	Neptini	Neptis	rivularis	-	-	MG741086	-	-	MG741687	-	MG741565	MG741507	MG741468	-	-	-	-	-	-	-	MG741921
JM2-17	Neptini	Neptis	saclava	-	-	MG741047	-	-	MG741649	-	MG741541	MG741499	-	-	-	-	-	-	-	-	-
NW84-5	Neptini	Neptis	sappho	-	-	MG741100	-	-	MG741701	-	MG741576	MG741511	MG741479	-	-	-	-	-	-	-	MG741934
PM15-11	Neptini	Neptis	satina	-	-	MG741106	-	-	MG741707	-	MG741578	-	MG741482	-	-	-	-	-	-	-	MG741940
BD005	Neptini	Neptis	sp	-	-	MG741009	-	-	MG741611	-	MG741513	-	MG741450	-	-	-	-	-	-	-	MG741866
BD008	Neptini	Neptis	sp	-	-	MG741010	-	-	MG741612	-	MG741514	-	MG741451	-	-	-	-	-	-	-	MG741867
NW97-2	Neptini	Neptis	taiwana	MG741846	-	MG741101	MG741792	MG741747	MG741702	MG741608	MG741577	-	MG741480	MG741435	MG741381	-	MG741297	MG741253	-	MG741152	MG741935
NW142-11	Neptini	Neptis	themis	MG741833	MG741861	MG741087	MG741780	MG741740	MG741688	-	MG741566	MG741508	MG741469	MG741422	MG741368	-	-	MG741246	-	MG741144	MG741922
JM2-21	Neptini	Neptis	woodwardi	-	-	MG741048	-	-	MG741650	-	MG741542	-	-	-	-	-	-	-	-	-	-
JM1-4	Neptini	Neptis	yunnana	-	-	MG741041	-	-	MG741642	-	MG741535	MG741495	-	-	-	-	-	-	-	-	-
NW137-3	Neptini	Pantoporia	consimilis	-	-	MG741085	-	-	MG741686	-	-	-	MG741467	-	-	-	-	-	-	-	MG741920
NW115-1	Neptini	Pantoporia	paraka	GQ864558	GQ864670	GQ864783	-	-	GQ864877	-	GQ864990	GQ865115	GQ865229	-	-	-	-	GQ865338	-	-	GQ864471
NW101-13	Neptini	Pantoporia	sandaka	MG741816	GQ864692	GQ864798	MG741763	MG741732	GQ864892	-	GQ865012	GQ865133	GQ865248	MG741405	MG741351	-	MG741269	GQ865353	-	MG741131	GQ864486
PM15-12	Neptini	Pantoporia	venilia	MG741853	-	MG741107	MG741799	MG741750	MG741708	-	MG741579	-	MG741483	MG741442	-	-	MG741303	-	-	MG741158	MG741941
SPM051	Neptini	Pantoporia	venilia	-	-	GQ923017	-	-	GQ923067	-	-	-	-	-	-	-	-	-	-	-	GQ923119
JM1-1	Neptini	Phaedyma	aspasia	MG741809	-	MG741036	MG741757	MG741727	MG741637	-	MG741530	-	MG741453	MG741397	MG741343	-	-	-	-	-	MG741892
NW70-7	Parthenini	Parthenos	sylvia	MG741842	EU141338	AY090218	MG741788	MG741744	AY090184	-	EU141515	EU141575	EU141639	MG741431	MG741377	MG741329	MG741293	EU141695	EU141416	MG741148	AY090151
NW157-2	Parthenini	Parthenos	tigrina	-	-	MG741090	-	-	MG741691	-	-	-	-	-	-	-	-	-	-	-	MG741925
NW116-2	Pseudacraeini	Pseudacraea	boisduvali	-	-	MG741070	-	-	MG741672	-	MG741554	-	MG741456	-	-	-	-	-	MG741196	-	MG741906
NW116-8	Pseudacraeini	Pseudacraea	dolomena	-	-	MG741074	-	-	MG741676	-	MG741558	-	MG741458	-	-	-	-	-	MG741200	-	MG741910
NW116-5	Pseudacraeini	Pseudacraea	eurytus	MG741827	-	MG741072	MG741774	-	MG741674	-	MG741556	-	MG741457	MG741416	MG741362	MG741324	MG741280	MG741241	MG741198	MG741140	MG741908
NW116-9	Pseudacraeini	Pseudacraea	lucretia	-	-	MG741075	-	-	MG741677	-	MG741559	-	MG741459	-	-	-	-	-	MG741201	-	MG741911
NW99-8	Pseudacraeini	Pseudacraea	poggei	MG741852	GQ864704	GQ864802	MG741798	-	GQ864896	MG741609	GQ865024	GQ865143	GQ865258	MG741441	MG741387	MG741336	MG741302	GQ865362	GQ865489	MG741157	GQ864490
NW116-6	Pseudacraeini	Pseudacraea	semire	-	-	MG741073	-	-	MG741675	-	MG741557	-	-	-	-	-	-	-	MG741199	-	MG741909
NW116-3	Pseudacraeini	Pseudacraea	warburgi	-	-	MG741071	-	-	MG741673	-	MG741555	-	-	-	-	-	-	-	MG741197	-	MG741907
NW123-21	Pseudoneptini	Pseudoneptis	bugandensis	MG741830	GQ864705	GQ864803	MG741777	-	GQ864897	-	GQ865025	GQ865144	GQ865259	MG741419	MG741365	-	MG741283	GQ865363	-	MG741142	GQ864491

## Sheet: Sheet1
code	tribe
NW116-2	Pseudacraeini	Pseudacraea
NW116-8	Pseudacraeini	Pseudacraea
NW116-5	Pseudacraeini	Pseudacraea
NW116-9	Pseudacraeini	Pseudacraea
NW99-8	Pseudacraeini	Pseudacraea
NW116-6	Pseudacraeini	Pseudacraea
NW116-3	Pseudacraeini	Pseudacraea
NW123-21	Pseudoneptini	Pseudoneptis
SS-041	Cymothoini	Cymothoe
SW-005	Cymothoini	Cymothoe
TL-011	Cymothoini	Cymothoe
OB-060	Cymothoini	Cymothoe
JB-001	Cymothoini	Cymothoe
RV-386	Cymothoini	Cymothoe
NW102-16	Cymothoini	Cymothoe
GW-4401	Cymothoini	Cymothoe
GW-13018	Cymothoini	Cymothoe
RV-332	Cymothoini	Cymothoe
TL-031	Cymothoini	Cymothoe
CREO-119	Cymothoini	Cymothoe
GW-12490	Cymothoini	Cymothoe
GW-14794	Cymothoini	Cymothoe
RV-226	Cymothoini	Cymothoe
FM-008	Cymothoini	Cymothoe
RV-390	Cymothoini	Cymothoe
RW-030	Cymothoini	Cymothoe
RV-060	Cymothoini	Cymothoe
RV-392	Cymothoini	Cymothoe
CREO-100	Cymothoini	Cymothoe
FM-183	Cymothoini	Cymothoe
NW102-8	Cymothoini	Harma

## Sheet: Sheet2
code	gene_code
FM-64
UN0771
KAP168
KAP005
KAP219
NW95-16
FM-68
FM-72
PM12-05
KAP088
PM12-14
KAP226
KAP097
KAP285
KAP293
FM-70
KAP077
NW167-16
UN0765
KAP270
